# Supplementary material
Source: Springer Nature journal article supplement (https://www.springermedizin.de/resource/supplementary/12889_2011_3286_MOESM2_ESM.pdf/9488774)
Supplement: MOESM2 [file 9488774]

**Gender**

**Female**

**Male**

**0%**

**20%**

**40%**

**60%**

**80%**

**100%**

**percent**

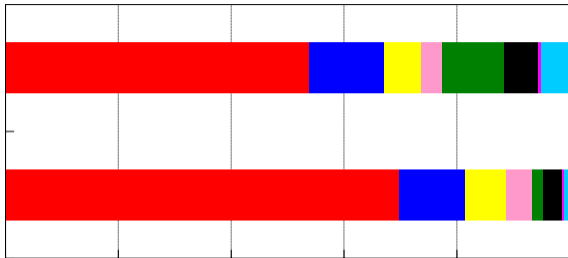

**Falls**

**Traffic injuries**

**Animal/insect bites**

**Cuts**

**Burns**

**Poisoning**

**Choking**

**Others**
